# Supplementary material
Source: HighWire-hosted journal article supplement (http://ajnr-stage2.highwire.org/highwire/filestream/95732/field_highwire_adjunct_files/0/0711.pdf)
Supplement: 0711.pdf [file 0711.pdf]

**Online Supplemental Data: Online Table 1.** Comparisons of the proportional distribution of the HMC variant across age groups. HMC = hand motor cortex.

|                     | Preterm neonates |          | Term neonates |          | Infants    |          | Toddlers   |          | Preschool children |          | School-age children |          | Adolescents |          |
|---------------------|------------------|----------|---------------|----------|------------|----------|------------|----------|--------------------|----------|---------------------|----------|-------------|----------|
|                     | Statistics       | <i>P</i> | Statistics    | <i>P</i> | Statistics | <i>P</i> | Statistics | <i>P</i> | Statistics         | <i>P</i> | Statistics          | <i>P</i> | Statistics  | <i>P</i> |
| Preterm neonates    | -                | -        | 34.34         | <0.001*  | 39.75      | <0.001*  | 47.59      | <0.001*  | 45.37              | <0.001*  | 72.18               | <0.001*  | 58.87       | <0.001*  |
| Term neonates       | -                | -        | -             | -        | 9.79       | 0.058    | 15.65      | 0.002*   | 13.38              | 0.006    | 72.18               | <0.001*  | 58.87       | <0.001*  |
| Infants             | -                | -        | -             | -        | -          | -        | 8.01       | 0.069    | 7.07               | 0.100    | 24.17               | <0.001*  | 21.84       | <0.001*  |
| Toddlers            | -                | -        | -             | -        | -          | -        | -          | -        | 2.11               | 0.685    | 8.93                | 0.061    | 10.49       | 0.020    |
| Preschool children  | -                | -        | -             | -        | -          | -        | -          | -        | -                  | -        | 2.75                | 0.417    | 7.71        | 0.026    |
| School-age children | -                | -        | -             | -        | -          | -        | -          | -        | -                  | -        | 1.08                | 0.785    | 2.48        | 0.286    |
| Adolescents         | -                | -        | -             | -        | -          | -        | -          | -        | -                  | -        | -                   | -        | 2.66        | 0.468    |

\*Monte Carlo method

**Online Supplemental Data: Online Table 2.** Clinical history of participants.

|                                                 | No. of Subjects (Column-Based Percentage) |                     |                   |                    |                              |                               |                       |
|-------------------------------------------------|-------------------------------------------|---------------------|-------------------|--------------------|------------------------------|-------------------------------|-----------------------|
|                                                 | All age stages<br>(n=542)                 | Neonates<br>(n=237) | Infants<br>(n=46) | Toddlers<br>(n=49) | Preschool children<br>(n=47) | School-age children<br>(n=94) | Adolescents<br>(n=69) |
| Healthy examination                             | 265<br>(48.89%)                           | 49<br>(20.68%)      | 38<br>(82.61%)    | 22<br>(44.90%)     | 33<br>(70.21%)               | 64<br>(68.09%)                | 59<br>(85.5%)         |
| Neonatal pneumonia                              | 108<br>(19.93%)                           | 108<br>(45.57%)     | 0<br>(0%)         | 0<br>(0%)          | 0<br>(0%)                    | 0<br>(0%)                     | 0<br>(0%)             |
| Neonatal / infantile diarrhea                   | 5<br>(0.92%)                              | 4<br>(1.69%)        | 1<br>(2.17%)      | 0<br>(0%)          | 0<br>(0%)                    | 0<br>(0%)                     | 0<br>(0%)             |
| Neonatal anemia                                 | 67<br>(12.36%)                            | 66<br>(27.85%)      | 1<br>(2.17%)      | 0<br>(0%)          | 0<br>(0%)                    | 0<br>(0%)                     | 0<br>(0%)             |
| Scalp hematomas                                 | 10<br>(1.85%)                             | 10<br>(4.22%)       | 0<br>(0%)         | 0<br>(0%)          | 0<br>(0%)                    | 0<br>(0%)                     | 0<br>(0%)             |
| ABO hemolytic disease of newborn                | 27<br>(4.98%)                             | 27<br>(11.39%)      | 0<br>(0%)         | 0<br>(0%)          | 0<br>(0%)                    | 0<br>(0%)                     | 0<br>(0%)             |
| Hydrocele of tunica vaginalis                   | 6<br>(1.11%)                              | 6<br>(2.53%)        | 0<br>(0%)         | 0<br>(0%)          | 0<br>(0%)                    | 0<br>(0%)                     | 0<br>(0%)             |
| Neonatal physiologic jaundice                   | 48<br>(8.86%)                             | 48<br>(20.25%)      | 0<br>(0%)         | 0<br>(0%)          | 0<br>(0%)                    | 0<br>(0%)                     | 0<br>(0%)             |
| Viral gastroenteritis/<br>Acute gastroenteritis | 5<br>(0.92%)                              | 2<br>(0.84%)        | 0<br>(0%)         | 0<br>(0%)          | 1<br>(2.13%)                 | 2<br>(2.13%)                  | 0<br>(0%)             |
| Thrush                                          | 7<br>(1.29%)                              | 4<br>(1.69%)        | 2<br>(4.35%)      | 1<br>(2.04%)       | 0<br>(0%)                    | 0<br>(0%)                     | 0<br>(0%)             |

|                                          |               |           |              |               |               |              |              |
|------------------------------------------|---------------|-----------|--------------|---------------|---------------|--------------|--------------|
| Pneumonia                                | 16<br>(2.95%) | 0<br>(0%) | 3<br>(6.52%) | 8<br>(16.33%) | 3<br>(6.38%)  | 2<br>(2.13%) | 0<br>(0%)    |
| Developmental<br>dysplasia of the<br>hip | 3<br>(0.55%)  | 0<br>(0%) | 3<br>(6.52%) | 0<br>(0%)     | 0<br>(0%)     | 0<br>(0%)    | 0<br>(0%)    |
| Exanthema<br>subitum                     | 2<br>(0.37%)  | 0<br>(0%) | 2<br>(4.35%) | 0<br>(0%)     | 0<br>(0%)     | 0<br>(0%)    | 0<br>(0%)    |
| Acute tonsillitis                        | 16<br>(2.95%) | 0<br>(0%) | 0<br>(0%)    | 5<br>(10.20%) | 5<br>(10.64%) | 3<br>(3.19%) | 3<br>(4.35%) |
| Upper respiratory<br>tract infection     | 18<br>(3.32%) | 0<br>(0%) | 0<br>(0%)    | 7<br>(14.29%) | 0<br>(0%)     | 9<br>(9.57%) | 2<br>(2.90%) |
| Bronchitis                               | 13<br>(2.40%) | 0<br>(0%) | 0<br>(0%)    | 3<br>(6.12%)  | 5<br>(10.64%) | 2<br>(2.13%) | 3<br>(4.35%) |
| Laryngitis                               | 2<br>(0.37%)  | 0<br>(0%) | 0<br>(0%)    | 2<br>(4.08%)  | 0<br>(0%)     | 0<br>(0%)    | 0<br>(0%)    |
| Facial paralysis                         | 18<br>(3.32%) | 0<br>(0%) | 0<br>(0%)    | 6<br>(12.24%) | 2<br>(4.26%)  | 5<br>(5.32%) | 5<br>(7.25%) |
| Nasosinusitis                            | 5<br>(0.92%)  | 0<br>(0%) | 0<br>(0%)    | 0<br>(0%)     | 2<br>(4.26%)  | 0<br>(0%)    | 3<br>(4.35%) |
| Chronic gastritis                        | 4<br>(0.74%)  | 0<br>(0%) | 0<br>(0%)    | 0<br>(0%)     | 0<br>(0%)     | 2<br>(2.13%) | 2<br>(2.90%) |
| Schoenlein-<br>Henoch purpura            | 4<br>(0.74%)  | 0<br>(0%) | 0<br>(0%)    | 0<br>(0%)     | 0<br>(0%)     | 4<br>(4.26%) | 0<br>(0%)    |
| Urinary tract<br>infection               | 2<br>(0.37%)  | 0<br>(0%) | 0<br>(0%)    | 0<br>(0%)     | 0<br>(0%)     | 2<br>(2.13%) | 0<br>(0%)    |
